# Supplementary material for: Antarctic Marine Algae Extracts as a Potential Natural Resource to Protect Epithelial Barrier Integrity
Source: MDPI journal article supplement (doi:10.3390/md20090562), 2022-08-31
Supplement: s1 [file s1]

## Supplementary Information

### 1. Supplementary Figures and Figure legends

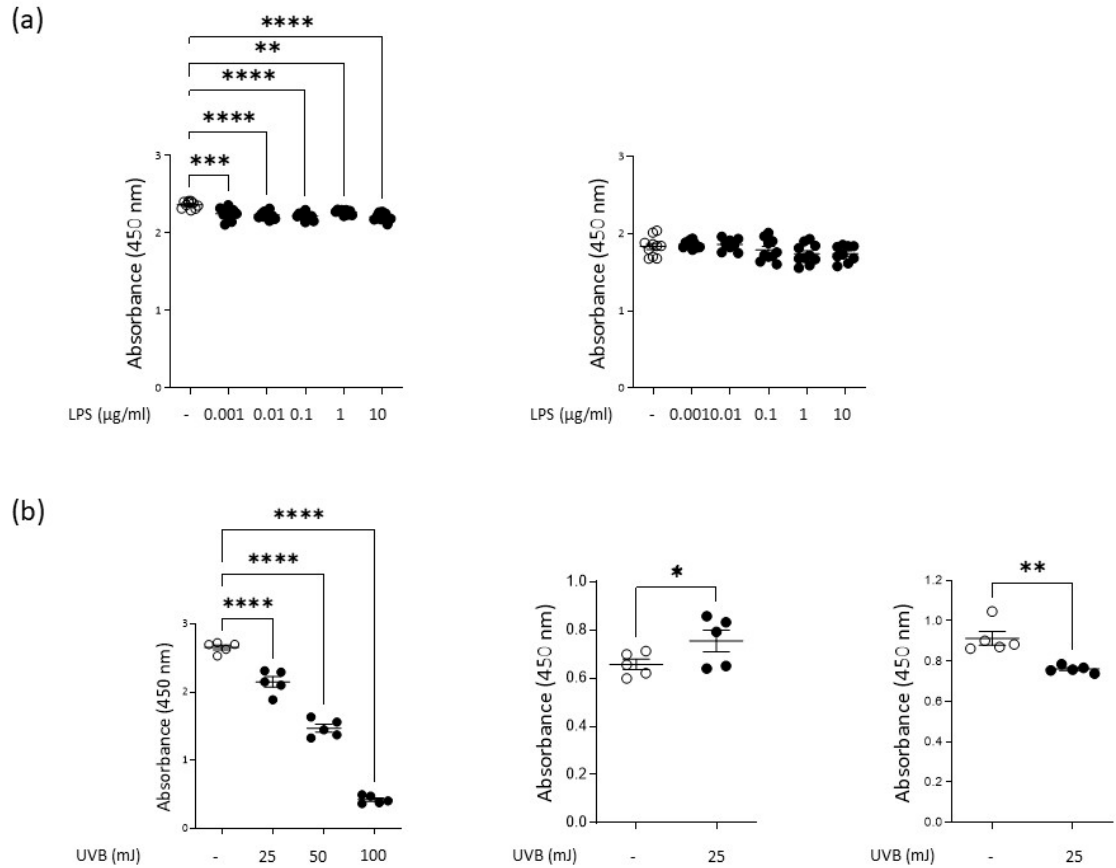

**Figure S1.** Optimal stress conditions that decrease survival of Caco-2 and HaCaT cells. (a) Caco-2 cell viability with lipopolysaccharide (LPS) treatment after 18 h (left) and 2 h (right). (b) Viability of ultraviolet (UV) B irradiated HaCaT cells after 18 h (left), 2 h (middle), and 4 h (right) of culture. Data are presented as the mean  $\pm$  SD. *P* values are determined by one-way ANOVA with Turkey's multiple comparisons test. \**P* < 0.05, \*\**P* < 0.01, and \*\*\*\**P* < 0.0001.

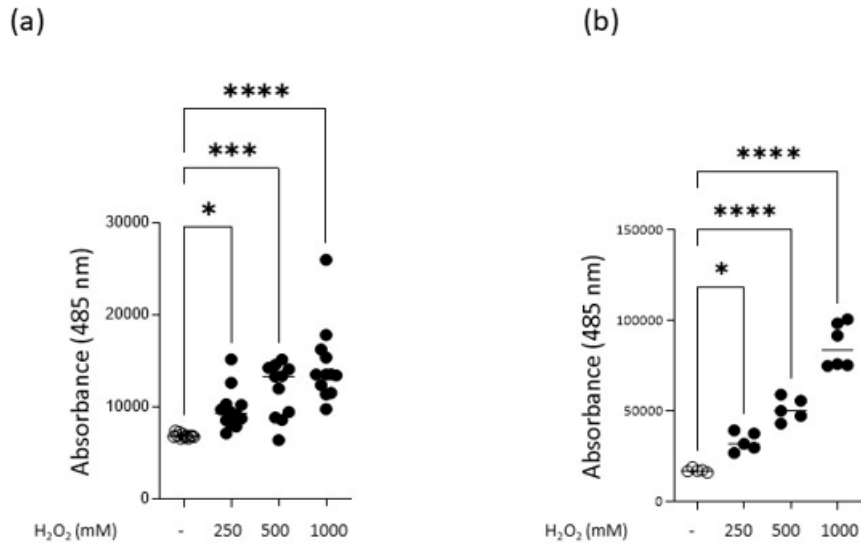

**Figure S2.** The optimal concentration of H<sub>2</sub>O<sub>2</sub> to increase reactive oxygen species (ROS) levels in Caco-2 cells and HaCaT cells. (a and b) Oxidation of Caco-2 cells (a) and HaCaT cells (b) treated with the indicated concentrations of H<sub>2</sub>O<sub>2</sub> for 18 h. Data are presented as the mean  $\pm$  SD. *P* values are determined by one-way ANOVA with Turkey's multiple comparisons test. \**P* < 0.05, \*\*\**P* < 0.001, and \*\*\*\**P* < 0.0001.

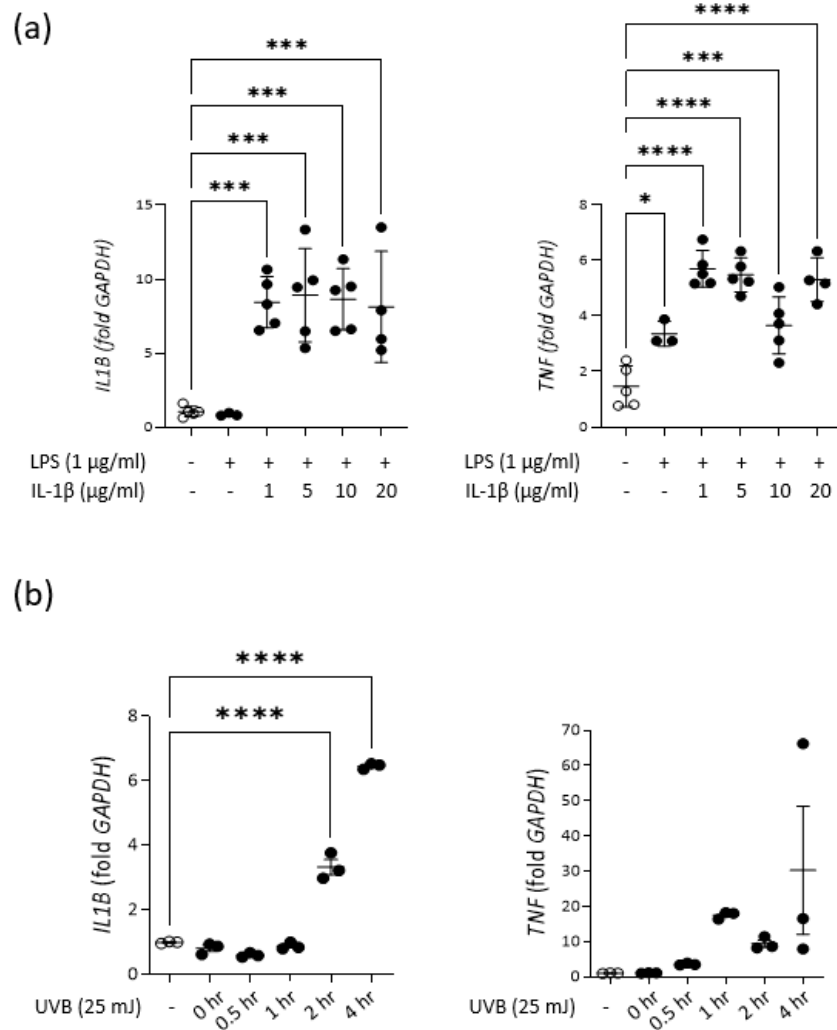

**Figure S3.** Optimal inflammatory stimulation and UVB irradiation to induce inflammatory mediators in Caco-2 and HaCaT cells, respectively. (a) mRNA expression of *IL1B* and *TNF* in Caco-2 cells stimulated with LPS (1 µg/mL) and various concentrations of IL-1β. (b) mRNA expression of *IL1B* and *TNF* in HaCaT cells irradiated with 25mJ/cm<sup>2</sup> UVB and incubated for the indicated times. Data are presented as the mean ± SD. *P* values are determined by one-way ANOVA with Turkey's multiple comparisons test. \*\*\**P* < 0.001 and \*\*\*\**P* < 0.0001.

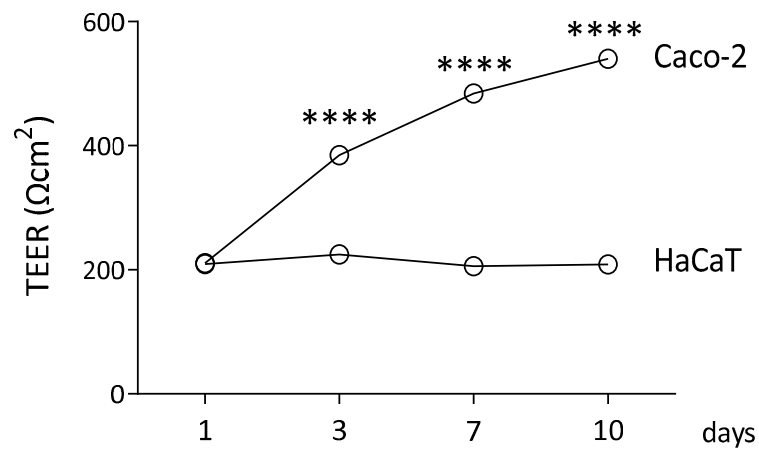

**Figure S4.** LPS treatment conditions to increase permeability in Caco-2 cells and HaCaT cells.

Transepithelial electrical resistance (TEER) of polarized Caco-2 cells and monolayer of HaCaT cells. Data are presented as the mean  $\pm$  SD. *P* values are determined by two-way ANOVA with Bonferroni's multiple comparisons test. \*\*\*\**P* < 0.0001.

## 2. Supplementary Table

**Table S1.** Primer sequences for real-time PCR

| Target gene   | Primer sequence                                                                     |
|---------------|-------------------------------------------------------------------------------------|
| <i>S100A8</i> | Forward: 5'- ACCGAGTGTCTCAGTATATCA -3'<br>Reverse: 5'- CTGGAGAAAGCCTTGAACCTCTA -3'  |
| <i>IL1B</i>   | Forward: 5'- CCACAGACCTTCCAGGAGAATG -3'<br>Reverse: 5'- GTGCAGTTCAGTGATCGTACAGG -3' |
| <i>IL8</i>    | Forward: 5'- AGAGTGATT GAGAGTGGACC -3'<br>Reverse: 5'- ACTTCTCCACAACCC TCTG -3'     |
| <i>TNF</i>    | Forward: 5'- CCTGTGAGGAGGACGAACAT -3'<br>Reverse: 5'- GGTTGAGGGTGTCTGAAGGA -3'      |
| <i>RIPK3</i>  | Forward: 5'- GCTGCTGTCTCCACGGTAA -3'<br>Reverse: 5'- CCATCCATTTCTGTCCCTCCTT -3'     |
| <i>GADPH</i>  | Forward: 5'-CTGGGCTACACTGAGCACC-3'<br>Reverse: 5'-AAGTGGTCGTTGAGGGCAATG-3'          |
